# Supplementary material for: Inflammatory Cytokine Levels in Patients with Autosomal Dominant Polycystic Kidney Disease
Source: PubMed Central journal article supplement — Kidney360. 2024 Jul 24;5(9):1289–98. doi: 10.34067/KID.0000000000000525 (PMC11441812; doi:10.34067/kid.0000000000000525), 2024-07-24
Supplement: kidney360-5-1289-s001.pdf [file kidney360-5-1289-s001.pdf]

## ASN Journal Disclosure Form

As per ASN journal policy, I have disclosed any financial relationships or commitments I have held in the past 36 months as included below. I have listed my Current Employer below to indicate there is a relationship requiring disclosure. If no relationship exists, my Current Employer is not listed.

S. Arjune reports the following:

Employer: University Hospital Cologne

I understand that the information above will be published within the journal article, if accepted, and that failure to comply and/or to accurately and completely report the potential financial conflicts of interest could lead to the following: 1) Prior to publication, article rejection, or 2) Post-publication, sanctions ranging from, but not limited to, issuing a correction, reporting the inaccurate information to the authors' institution, banning authors from submitting work to ASN journals for varying lengths of time, and/or retraction of the published work.

Name: Sita Arjune

Manuscript ID: K360-2024-000244R1

Manuscript Title: Inflammatory cytokine levels in patients with autosomal dominant polycystic kidney disease (ADPKD)

Date of Completion: June 26, 2024

Disclosure Updated Date: June 26, 2024

## ASN Journal Disclosure Form

As per ASN journal policy, I have disclosed any financial relationships or commitments I have held in the past 36 months as included below. I have listed my Current Employer below to indicate there is a relationship requiring disclosure. If no relationship exists, my Current Employer is not listed.

F. Grundmann reports the following:

Employer: University of Cologne; Consultancy: partner: Alnylam, Vifor, GSK, AICURIS, Vertex;; Ownership Interest: partner: Bayer; Santa Barbara Nutrients;; Honoraria: see consultancy; Patents or Royalties: partner: : Detechgene;; and Advisory or Leadership Role: partner: : Scientific Advisory Board Santa Barbara Nutrients.;

I understand that the information above will be published within the journal article, if accepted, and that failure to comply and/or to accurately and completely report the potential financial conflicts of interest could lead to the following: 1) Prior to publication, article rejection, or 2) Post-publication, sanctions ranging from, but not limited to, issuing a correction, reporting the inaccurate information to the authors' institution, banning authors from submitting work to ASN journals for varying lengths of time, and/or retraction of the published work.

Name: Franziska Grundmann

Manuscript ID: K360-2024-000244R1

Manuscript Title: Inflammatory cytokine levels in patients with autosomal dominant polycystic kidney disease (ADPKD)

Date of Completion: July 18, 2024

Disclosure Updated Date: July 18, 2024

## ASN Journal Disclosure Form

As per ASN journal policy, I have disclosed any financial relationships or commitments I have held in the past 36 months as included below. I have listed my Current Employer below to indicate there is a relationship requiring disclosure. If no relationship exists, my Current Employer is not listed.

K. Lettenmeier reports the following:  
Employer: University Clinic Cologne

I understand that the information above will be published within the journal article, if accepted, and that failure to comply and/or to accurately and completely report the potential financial conflicts of interest could lead to the following: 1) Prior to publication, article rejection, or 2) Post-publication, sanctions ranging from, but not limited to, issuing a correction, reporting the inaccurate information to the authors' institution, banning authors from submitting work to ASN journals for varying lengths of time, and/or retraction of the published work.

Name: Katharina Leone Lettenmeier

Manuscript ID: K360-2024-000244R1

Manuscript Title: Inflammatory cytokine levels in patients with autosomal dominant polycystic kidney disease (ADPKD)

Date of Completion: June 24, 2024

Disclosure Updated Date: June 24, 2024

## ASN Journal Disclosure Form

As per ASN journal policy, I have disclosed any financial relationships or commitments I have held in the past 36 months as included below. I have listed my Current Employer below to indicate there is a relationship requiring disclosure. If no relationship exists, my Current Employer is not listed.

E. Mahabir-Brenner has nothing to disclose.

I understand that the information above will be published within the journal article, if accepted, and that failure to comply and/or to accurately and completely report the potential financial conflicts of interest could lead to the following: 1) Prior to publication, article rejection, or 2) Post-publication, sanctions ranging from, but not limited to, issuing a correction, reporting the inaccurate information to the authors' institution, banning authors from submitting work to ASN journals for varying lengths of time, and/or retraction of the published work.

Name: Esther, Prof. Dr. Mahabir-Brenner

Manuscript ID: K360-2024-000244R1

Manuscript Title: Inflammatory cytokine levels in patients with autosomal dominant polycystic kidney disease (ADPKD)

Date of Completion: June 24, 2024

Disclosure Updated Date: June 24, 2024

## ASN Journal Disclosure Form

As per ASN journal policy, I have disclosed any financial relationships or commitments I have held in the past 36 months as included below. I have listed my Current Employer below to indicate there is a relationship requiring disclosure. If no relationship exists, my Current Employer is not listed.

M. Majjouti reports the following:

Employer: Center for Molecular Medicine, University of Cologne (CMMC)

I understand that the information above will be published within the journal article, if accepted, and that failure to comply and/or to accurately and completely report the potential financial conflicts of interest could lead to the following: 1) Prior to publication, article rejection, or 2) Post-publication, sanctions ranging from, but not limited to, issuing a correction, reporting the inaccurate information to the authors' institution, banning authors from submitting work to ASN journals for varying lengths of time, and/or retraction of the published work.

Name: Mohamed Majjouti

Manuscript ID: K360-2024-000244R1

Manuscript Title: Inflammatory cytokine levels in patients with autosomal dominant polycystic kidney disease (ADPKD)

Date of Completion: July 2, 2024

Disclosure Updated Date: July 2, 2024

## ASN Journal Disclosure Form

As per ASN journal policy, I have disclosed any financial relationships or commitments I have held in the past 36 months as included below. I have listed my Current Employer below to indicate there is a relationship requiring disclosure. If no relationship exists, my Current Employer is not listed.

R. Mueller reports the following:

Employer: Dept. II of Internal Medicine, University Hospital Cologne, University of Cologne; Consultancy: Alynlam, Vifor, GSK, AICURIS, Vertex; Ownership Interest: Bayer; Santa Barbara Nutrients; Honoraria: see consultancy; Patents or Royalties: Detechgene; and Advisory or Leadership Role: Scientific Advisory Board Santa Barbara Nutrients.

I understand that the information above will be published within the journal article, if accepted, and that failure to comply and/or to accurately and completely report the potential financial conflicts of interest could lead to the following: 1) Prior to publication, article rejection, or 2) Post-publication, sanctions ranging from, but not limited to, issuing a correction, reporting the inaccurate information to the authors' institution, banning authors from submitting work to ASN journals for varying lengths of time, and/or retraction of the published work.

Name: Roman-Ulrich Mueller

Manuscript ID: K360-2024-000244R1

Manuscript Title: Inflammatory cytokine levels in patients with autosomal dominant polycystic kidney disease (ADPKD)

Date of Completion: July 14, 2024

Disclosure Updated Date: July 14, 2024

## ASN Journal Disclosure Form

As per ASN journal policy, I have disclosed any financial relationships or commitments I have held in the past 36 months as included below. I have listed my Current Employer below to indicate there is a relationship requiring disclosure. If no relationship exists, my Current Employer is not listed.

M. Späth reports the following:

Honoraria: BAYER AG; STADAPHARM GmbH

I understand that the information above will be published within the journal article, if accepted, and that failure to comply and/or to accurately and completely report the potential financial conflicts of interest could lead to the following: 1) Prior to publication, article rejection, or 2) Post-publication, sanctions ranging from, but not limited to, issuing a correction, reporting the inaccurate information to the authors' institution, banning authors from submitting work to ASN journals for varying lengths of time, and/or retraction of the published work.

Name: Martin R. Späth

Manuscript ID: K360-2024-000244R1

Manuscript Title: Inflammatory cytokine levels in patients with autosomal dominant polycystic kidney disease (ADPKD).

Date of Completion: June 25, 2024

Disclosure Updated Date: March 26, 2024

## ASN Journal Disclosure Form

As per ASN journal policy, I have disclosed any financial relationships or commitments I have held in the past 36 months as included below. I have listed my Current Employer below to indicate there is a relationship requiring disclosure. If no relationship exists, my Current Employer is not listed.

P. Todorova reports the following:  
Employer: University Hospital Cologne

I understand that the information above will be published within the journal article, if accepted, and that failure to comply and/or to accurately and completely report the potential financial conflicts of interest could lead to the following: 1) Prior to publication, article rejection, or 2) Post-publication, sanctions ranging from, but not limited to, issuing a correction, reporting the inaccurate information to the authors' institution, banning authors from submitting work to ASN journals for varying lengths of time, and/or retraction of the published work.

Name: Polina Todorova  
Manuscript ID: K360-2024-000244R1  
Manuscript Title: "Inflammatory cytokine levels in patients with autosomal dominant polycystic kidney disease (ADPKD)"  
Date of Completion: June 24, 2024  
Disclosure Updated Date: June 24, 2024
